# Supplementary material for: Zeolite nanoparticles with immobilized metal ions: isolation and MALDI-TOF-MS/MS identification of phosphopeptides
Source: Royal Society of Chemistry journal article supplement (doi:10.1039/b411336e), 2004-01-01
Supplement: b411336e.pdf [file b411336e.pdf]

Electronic supplementary information of the paper entitled “ **Zeolite nanoparticles with immobilized metal ion: isolation and MALDI-TOF-MS/MS identification of phosphopeptides**”.

**Experimental details:**

*Protein digestion:*

Bovine  $\beta$ -casein, 2 mg/mL in 50 mM ammonium bicarbonate buffer at pH 8.3, was incubated at 37 °C with trypsin (E:S = 1:50) for 18 h.

*Isolation of phosphopeptide from  $\beta$ -casein digest by  $Fe^{3+}$  ion-immobilized zeolite nanoparticles ( $Fe^{3+}$ -nanozeolites):*

$Fe^{3+}$ -nanozeolites suspension (10  $\mu$ L of 3 mg/mL) was added into 0.2 mL of 5ng/ $\mu$ L or 0.5 ng/ $\mu$ L  $\beta$ -casein peptide digests solution. Then the solution containing peptides and  $Fe^{3+}$ -nanozeolites was vibrated at 37 °C for 90 min, and centrifugated at 17000 rpm for 15 min. After removing the supernate, the residual peptides/ $Fe^{3+}$ -nanozeolites were redispersed into 5  $\mu$ L of 50% acetonitrile aqueous solution.

*MALDI-TOF-MS process:*

Peptides/  $Fe^{3+}$ -nanozeolites were deposited on the MALDI target using dried droplet method. 0.35  $\mu$ L of the above slurry was spotted onto the MALDI plate and then another 0.35  $\mu$ L of  $\alpha$ -CHCA saturated solution (in 50% acetonitrile aqueous solution containing 0.1% trifluoroacetic acid) was introduced. Positive ion MALDI-TOF mass spectra were acquired on 4700 Proteomics Analyzer (Applied Biosystems, USA). Sample desorption was achieved using an Nd-YAG laser (355 nm) operated at a repetition rate of 200 Hz and acceleration voltage of 20 kV.

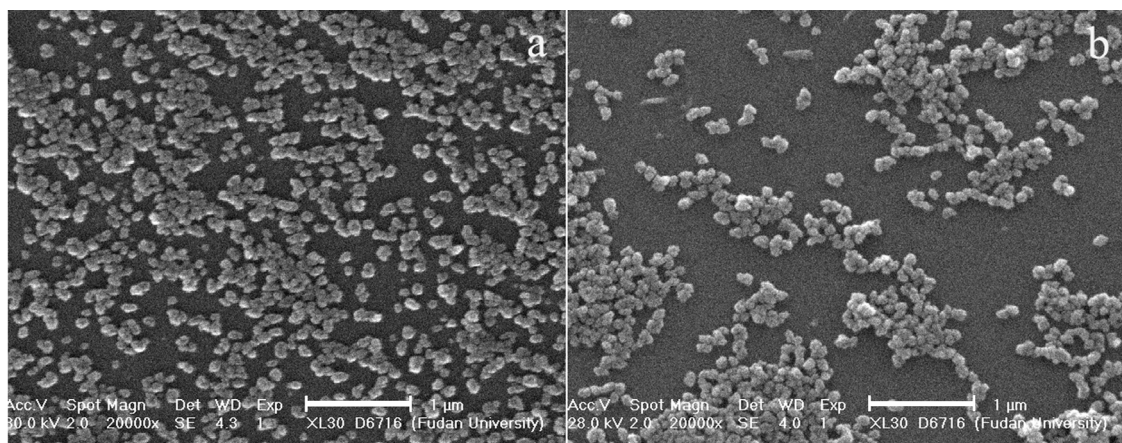

**Fig. S1** SEM images of zeolite-beta nanoparticles before (a) and after (b) immobilizing metal ions. The SEM images indicate that this covalent modification has no influence on the morphology of nanoparticles. 1 bar is 1  $\mu\text{m}$ .

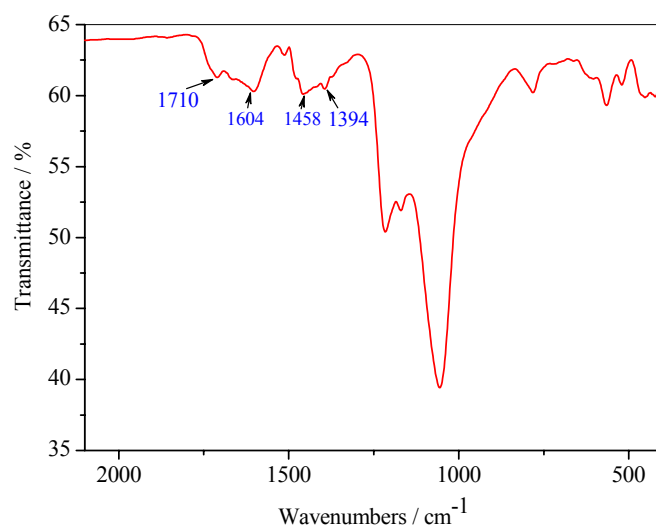

**Fig. S2** FT-IR spectrum of the  $\text{Fe}^{3+}$ -nanozeolites. The absorption on  $1604\text{ cm}^{-1}$  and  $1458\text{--}1394\text{ cm}^{-1}$  could be assigned to the anti-symmetric and symmetric stretching vibration of carboxylate, respectively.

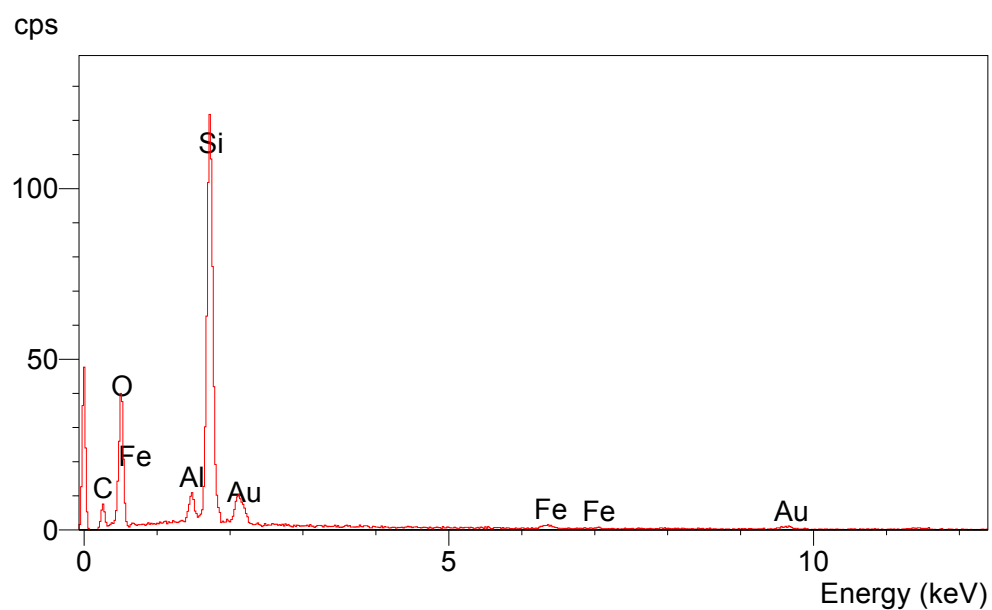

**Fig. S3** Energy dispersive spectrum (EDS) analyses of the  $\text{Fe}^{3+}$ -nanzeolites. The EDS analysis was carried out by means of a Philips XL30 scanning electron microscope. The appearance of Au element can be attributed to the sprinkling Au on the sample before SEM analysis.
